# Supplementary material
Source: PubMed Central journal article supplement (PMC3084079)
Supplement: 1008882108_pnas.201008882SI.pdf [file 1008882108_pnas.201008882SI.pdf]

# Supporting Information

Pagani et al. 10.1073/pnas.1008882108

## SI Materials and Methods

**Statistical Methods: Period.** For each luciferase measurement, the period of oscillation was calculated by least-mean-squares fitting of dampened sine wave functions to the actual data. The period of the sine wave with the best least-squares fit to the data was assumed to be the true period of oscillation. Because the period length of the first day after synchronization varied according to the conditions of synchronization, it was not included in these calculations; rather, period was determined by analyzing only days 2–5. For each period measurement, at least three separate ex-

perimental measurements were done for each biopsy, using two biopsies from each individual. Period values are presented as mean  $\pm$  SE.

**Statistical Methods: Relative Amplitude.** The amplitudes of the second and third cycles of circadian expression were obtained as the difference between the peak and nadir expression values of these cycles. These measurements then were normalized using the absolute raw-data magnitude of the first peak as an approximate measure of reporter virus infection efficiency in each culture.

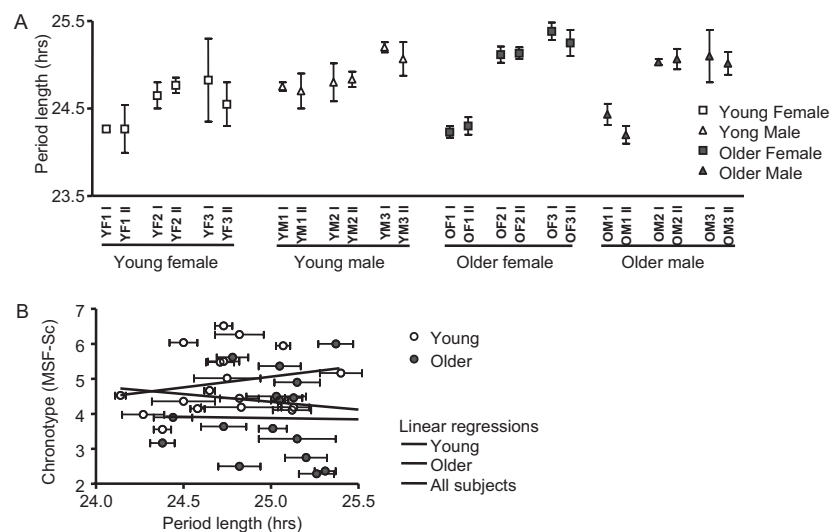

**Fig. S1.** (A) Period lengths obtained from two different biopsies taken from three young females (YF), three young males (YM), three older females (OF), and three older males (OM). Each bar represents the mean of three independent measurements per biopsy  $\pm$  SEM. (B) Comparison between chronotype and in vitro circadian period length for the two groups of subjects ( $P_{all\ subjects} = 0.3707$ ;  $P_Y = 0.3785$ ;  $P_O = 0.9229$ ). The x axis shows period length in hours. Period length values are shown as the mean of six independent measurements  $\pm$  SEM. The y axis shows subject mean sleep phase corrected for sex and cumulative sleep debt (MSF-Sc). This statistic is the output of the Munich Chronotype Questionnaire and is widely used as a reliable measure of human chronotype.





**Table S1. Subject characteristics**

| Category | N  | Age (y $\pm$ SD) | Chronotype (MSF-Sc $\pm$ SD) | Fibroblast period length (h $\pm$ SD) |
|----------|----|------------------|------------------------------|---------------------------------------|
| Young    | 18 | 25.44 $\pm$ 3.58 | 4.98 $\pm$ 0.84              | 24.73 $\pm$ 0.32                      |
| Female   | 7  | 25.86 $\pm$ 2.48 | 4.86 $\pm$ 0.78              | 24.80 $\pm$ 0.38                      |
| Male     | 11 | 25.18 $\pm$ 4.24 | 5.06 $\pm$ 0.91              | 24.69 $\pm$ 0.29                      |
| Older    | 18 | 67.89 $\pm$ 7.32 | 3.88 $\pm$ 1.12              | 24.94 $\pm$ 0.37                      |
| Female   | 7  | 65.43 $\pm$ 4.12 | 4.01 $\pm$ 1.22              | 24.96 $\pm$ 0.35                      |
| Male     | 11 | 69.45 $\pm$ 8.61 | 3.79 $\pm$ 1.10              | 24.92 $\pm$ 0.40                      |

MSF-Sc, mean sleep phase, corrected for sex and cumulative sleep debt. (Further details are given in the main text and in the legend for Fig. S1.)

**Table S2. Detailed subject information**

| Age (y) | Sex | Chronotype (MSF-Sc) | Fibroblast period length |      |   |
|---------|-----|---------------------|--------------------------|------|---|
|         |     |                     | Time (h)                 | SD   | n |
| 28      | F   | 3.98                | 24.27                    | 0.30 | 6 |
| 23      | F   | 6.04                | 24.50                    | 0.21 | 7 |
| 27      | F   | 5.48                | 24.71                    | 0.20 | 6 |
| 29      | F   | 5.02                | 24.75                    | 0.45 | 6 |
| 27      | F   | 4.19                | 24.83                    | 0.51 | 5 |
| 23      | F   | 4.11                | 25.12                    | 0.27 | 6 |
| 24      | F   | 5.17                | 25.40                    | 0.27 | 5 |
| 27      | M   | 4.53                | 24.14                    | 0.08 | 6 |
| 21      | M   | 3.56                | 24.38                    | 0.12 | 6 |
| 31      | M   | 4.36                | 24.50                    | 0.39 | 5 |
| 21      | M   | 4.15                | 24.58                    | 0.11 | 7 |
| 21      | M   | 4.67                | 24.65                    | 0.06 | 6 |
| 31      | M   | 5.50                | 24.73                    | 0.17 | 4 |
| 22      | M   | 6.52                | 24.73                    | 0.13 | 6 |
| 24      | M   | 6.27                | 24.82                    | 0.34 | 6 |
| 31      | M   | 4.45                | 24.82                    | 0.26 | 6 |
| 26      | M   | 5.95                | 25.07                    | 0.11 | 6 |
| 22      | M   | 4.19                | 25.13                    | 0.23 | 6 |
| 65      | F   | 3.17                | 24.27                    | 0.14 | 6 |
| 61      | F   | 3.64                | 24.73                    | 0.31 | 6 |
| 73      | F   | 3.58                | 25.01                    | 0.20 | 6 |
| 62      | F   | 4.46                | 25.13                    | 0.13 | 6 |
| 63      | F   | 4.90                | 25.15                    | 0.30 | 5 |
| 68      | F   | 2.29                | 25.26                    | 0.24 | 6 |
| 66      | F   | 6.00                | 25.20                    | 0.17 | 6 |
| 64      | M   | 3.90                | 23.99                    | 0.27 | 6 |
| 65      | M   | 5.62                | 24.32                    | 0.21 | 6 |
| 70      | M   | 2.50                | 24.82                    | 0.24 | 4 |
| 70      | M   | 4.50                | 25.03                    | 0.40 | 7 |
| 60      | M   | 5.37                | 25.05                    | 0.27 | 6 |
| 65      | M   | 4.39                | 25.05                    | 0.13 | 5 |
| 70      | M   | 3.29                | 25.15                    | 0.55 | 6 |
| 83      | M   | 2.75                | 25.20                    | 0.30 | 6 |
| 66      | M   | 2.37                | 25.18                    | 0.20 | 6 |
| 63      | M   | 3.27                | 25.29                    | 0.08 | 6 |
| 88      | M   | 3.75                | 25.01                    | 0.19 | 7 |

Subjects highlighted in gray also were the source of biopsied fibroblasts used in characterization of blood sera.

**Table S3. Blood donor characteristics**

| Blood donor | Sex | Age (y) | Medications                                                                                |
|-------------|-----|---------|--------------------------------------------------------------------------------------------|
| Y1          | M   | 21      | No                                                                                         |
| Y2          | M   | 20      | No                                                                                         |
| Y3          | M   | 32      | Citalopram-hormosan (120 mg/d)                                                             |
| Y4          | M   | 21      | No                                                                                         |
| Y5          | M   | 26      | No                                                                                         |
| Y6          | M   | 27      | No                                                                                         |
| Y7          | M   | 31      | No                                                                                         |
| Y8          | M   | 26      | No                                                                                         |
| O1          | M   | 81      | Daflon (500 mg/d)                                                                          |
| O2          | F   | 83      | Aspirine Cardio (100 mg/d); metoprolol (50 mg/d); perindopril/indapamin (4 mg/d/1.25 mg/d) |
| O3          | F   | 67      | No                                                                                         |
| O4          | M   | 80      | Aspirine Cardio (100 mg/d); amlodipine maleate (2.5 mg/d); chlorthalidone (12,5 mg/d)      |
| O5          | M   | 61      | Aspirine Cardio (100 mg/d); simvastatin (40 mg/d)                                          |
| O6          | F   | 61      | No                                                                                         |
| O7          | M   | 63      | No                                                                                         |
| O8          | F   | 56      | No                                                                                         |
| O9          | M   | 61      | No                                                                                         |

O, old; Y, young.
